# Supplementary material for: Four DNA methylation biomarkers in biliary brush samples accurately identify the presence of cholangiocarcinoma
Source: PubMed Central journal article supplement — Hepatology. 2015 Feb 24;61(5):1651–9. doi: 10.1002/hep.27707 (PMC4832263; doi:10.1002/hep.27707), 2015-02-24
Supplement: HEP-61-1651-s001.pdf [file HEP-61-1651-s001.pdf]

## Supplementary material

### DNA isolation

For fresh frozen tissue samples, DNA was extracted from approximately 25 mg of tissue using the AllPrep DNA/RNA kit (Qiagen Inc, Valencia, CA) as previously described.<sup>(1)</sup> For archived material, DNA was isolated from five sections of paraffin embedded tissue (each 20 µm), using the QIAamp DNA kit (Qiagen). For the snap frozen biliary brush samples, DNA was isolated using the PrepFiler Forensic DNA Extraction Kit (Applied Biosystems, CA, USA) according to the manufacturer's protocol. Briefly, 500 µl lysis buffer containing DL-Dithiothreitol solution (1M) was added to the Eppendorf tubes containing the brush and were shaken by an Eppendorf thermomixer comfort (Eppendorf, Hamburg, Germany) for 40 min at 70°C. The tubes were centrifuged before removing the brushes. Fifteen µl magnetic beads were added to the supernatant and the reaction was briefly vortexed before adding 300 µl isopropanol. Samples were shaken for 10 min at room temperature. A magnetic stand was used to collect the magnetic beads and the bound DNA, and the samples were subsequently washed three times with wash buffer before they were eluted in 50 µl elution buffer. The ethanol preserved specimens were centrifuged at maximum speed for one min in an Eppendorf centrifuge (Eppendorf Centrifuge model 5415R). The resulting pellets were subjected to vacuum centrifuging for about 30 min to remove all remaining ethanol, before 300 µl lysis buffer was added to the sample and the DNA was isolated using the PrepFiler Forensic DNA Extraction kit (as described above). DNA concentration was determined using the ND-1000 Nanodrop (NanoDrop Technologies, Wilmington, DE).

### Functional and expressional aspects of the four individual diagnostic genes

#### *CDO1*

Located on 5q23, cysteine dioxygenase type 1 (*CDO1*) has recently been implicated in the development of both non-malignant diseases and cancer (2, 3). It is a non-heme iron dioxygenase regulating the flux between cysteine catabolism and glutathione synthesis, where it oxidizes cysteine to sulfinic acid (2, 4). It is involved in the synthesis of several important metabolic compounds including pyruvate and taurine (5), the latter is a major constituent in bile. In breast cancer, Jeschke *et al.* have reported that *CDO1* is inactivated by DNA promoter hypermethylation in as many as 60% of the cases (4). When *CDO1* expression was restored using a lentiviral approach, the growth and viability of breast

cancer cells were reduced and the cells became sensitive to anthracycline treatment (6). Furthermore, in a study from Peter Jones' lab an epigenetic screen coupled with functional studies performed in colon cancer cell lines showed that inactivating promoter hypermethylation of *CDO1* was important for cell survival, supporting that loss of this gene may have a driver role in tumorigenesis (7). Interestingly, in a study by Prabhu *et al.*, metabolomic profiling of 69 patient-derived glioma samples revealed a novel metabolic pathway with increased cysteine sulfinic acid as a result of increased *CDO1* expression (8). By applying a lentiviral-mediated short hairpin RNA approach, they abolished the activity of this pathway *in vivo* in a glioblastoma mouse model. This led to a significant tumor growth inhibition, suggesting that *CDO1* expression may have a different role in gliomas compared to other cancer types. The authors further suggest that this metabolic pathway could serve as a therapeutic target in these aggressive high-grade gliomas (8). In contrast to this, tumor suppressor activity of *CDO1* was recently investigated also by Brait and colleagues in both cell cultures (breast-, colorectal-, esophageal-, gastric-, hepatocellular-, and lung cancer) and mouse models (colorectal cancer). They showed that forced *CDO1* expression markedly reduced tumor cell growth, and conversely that reduced *CDO1* expression increased cell growth, implying a bona fide tumor suppressor function for this gene (3).

*CDO1* has been found to be highly expressed in the liver and placenta, but it has also been detected in the brain, heart and pancreas (9). We have previously demonstrated an inverse correlation between DNA promoter methylation and *CDO1* gene expression in a large panel of cell lines from 17 different cancer types, including cholangiocarcinoma. Treating a subset of these cell lines (HCT15, HT29, SW48, and SW480) with epigenetic drugs (5-aza-2'-deoxycytidine in combination with trichostatin A) considerably increased the *CDO1* expression (10), underscoring that DNA promoter methylation is a likely regulator of *CDO1* expression. Analyzing sample series from cholangiocarcinoma, colorectal-, gastric-, and pancreatic cancer, we further demonstrated that the promoter region of *CDO1* was frequently methylated across several cancer types (1, 10). In line with this, the previously mentioned Brait study showed a similar high methylation frequency in colorectal- and gastric cancer (*ca.* 90%), in addition to bladder-, breast-, esophagus-, and lung cancer. By analyzing the expression of *CDO1* in these cancer types, significant repression was identified at both the RNA and protein level in tumors (3). In an effort to identify novel diagnostic biomarkers for non-small cell lung cancer, Wrangle and colleagues recently used epigenetic drug treatment of cell lines as well as a large publically available

database and patient material. A three-gene biomarker panel including *CDO1* was identified. They reported a sensitivity of up to 99% and a complete specificity of 100% (11).

In the current study, we have obtained gene expression data (RNA seq) from The Cancer Genome Atlas (TCGA; Supplementary figure 1). In concordance with the generally high methylation frequency (77%) that we report here, a significant reduction in *CDO1* expression was observed in cholangiocarcinomas compared with non malignant controls. A direct causation of the presence of promoter DNA methylation and reduced *CDO1* gene expression cannot be confirmed for cholangiocarcinomas at this point since these analyses have been performed in different samples. However, based on the combined scientific data presented above is not unlikely that *CDO1* is epigenetically regulated also in cholangiocarcinomas.

### ***CNRIP1***

Cannabinoid receptor interacting protein 1 (*CNRIP1*), located on 2p14, is encoding a protein that interacts with the C-terminal end of the cannabinoid receptor 1 (12). *CNRIP1* was annotated as an open reading frame (*C2orf32*) until the genome assembly hg18 in 2006, and so far little is known about the function of this protein in general and its potential role in cancer in particular. Also in 2006, *CNRIP1* was identified as a promoter DNA methylation target gene in colorectal cancer (13), and later we demonstrated that it was frequently methylated also in adenomas (14). Recently, *CNRIP1* was reported to be hypermethylated in Non-Hodgkins Lymphomas (15), where it is associated with worse overall survival in patients with diffuse large B-cell lymphoma. In line with *CDO1*, we have previously demonstrated an inverse correlation between *CNRIP1* mRNA expression and promoter methylation in a panel of cancer cell lines (14). Such an association could also be seen in colorectal cancer tissue samples, although not equally strong (11). When cell lines harbouring promoter DNA methylation of *CNRIP1* were treated with epigenetic drugs (5-aza-2'-deoxycytidine and trichostatin A), the gene expression increased several folds (11) underscoring that the methylation may affect the gene expression. However, this was not supported in an array-based study where intermediate expression levels of *CNRIP1* was maintained in the presence of cancer specific methylation in a small set of colorectal tumors (16). Recently, aberrantly methylated *CNRIP1* was identified also in diffuse-type gastric carcinomas (17), supporting the notion of similarities across gastrointestinal malignancies (3,

10, 18-20). Here, we report a frequent *CNRIP1* methylation of 82% in cholangiocarcinomas. Since the TCGA RNA Seq-data (Supplementary Figure 1) depict a low *CNRIP1* expression in the control samples, a transcriptional reduction in CCAs cannot be observed. Interestingly, we have previously shown that *CNRIP1* is methylated in 40% of normal appearing mucosa samples taken at a distance from a colorectal cancer, indicating an epigenetic field defect (14). It cannot be ruled out that the matching controls included in the TCGA data set also are affected by such a field defect.

Although the role of this gene tumorigenesis in general remains to be fully understood, the high methylation frequency identified also in cholangiocarcinomas suggest a biomarker role for *CNRIP1* in gastrointestinal cancers

## ***SEPT9***

*SEPT9* is located on 17q25, and is a member of a large family of septin proteins involved in cytokinesis and cell cycle control and it has multiple distinct transcripts which play important physiological roles, including in actin dynamics, angiogenesis, cell motility, proliferation, and microtubule regulation (21, 22). It is suggested that *SEPT9* is included in multisubunit heteromers and is critical for final separation of daughter cells during cytokinesis (23), and a compromised transcription of *SEPT9* may influence the septin heteromer complex. Moreover, knockout of *SEPT9* has been shown to be lethal in mouse embryos (24). In cancer, *SEPT9* has been implicated in the development of malignancies of various tissues, including breast, colon, ovary, head and neck, and cells of the immune system (25-31). Promoter hypermethylation of *SEPT9* is already established as a clinical biomarker for detecting colorectal cancer using circulating DNA. Recently, a large prospective international study (The PRospective Evaluation of SEPTin 9 (PRESEPT) study) addressed its performance in almost 8000 asymptomatic patients. Across all stages, a sensitivity of 48% and a specificity of 92% were reported (29). It was also recommended to improve the sensitivity for early cancers before utilization as a population screening test (32).

In colorectal cancer, a significant inverse correlation between *SEPT9* promoter methylation and mRNA expression has been demonstrated and is proposed to account for the progression from benign to malignant lesion (33). However, overexpression of various *SEPT9* isoforms have been shown across

several studies including breast-, prostate-, ovarian-, and hepatic cancer. This is probably a result of DNA methylation at alternative promoters and/or genomic amplification, suggestive of aberrant expression of *SEPT9* isoforms in a tissue specific manner (21, 27, 30, 34, 35). In line with this, we observe an up-regulation of *SEPT9* in TCGA data in cholangiocarcinomas compared to the controls (supplementary figure 1). However, since we only observed 26% methylation of *SEPT9* in our cholangiocarcinoma samples, this increase in expression could be the contribution of the unmethylated tumors. This underscores that the molecular mechanisms regarding *SEPT9* expression and its role in cholangiocarcinoma should be further studied.

## ***VIM***

*VIM*, located on 10p13, encodes a member of the intermediate filament family and the protein is involved in the maintenance of cell shape, integrity of the cytoplasm and stabilization of cytoskeletal interactions (36). It has also been shown to be involved in immune response (37), transport of low-density lipoprotein (38), and seems to function as an organizer of critical proteins involved in attachment, migration, and cell signalling (39, 40). Expression of *VIM* has been identified in mesenchymal cell types including fibroblasts and endothelial cells, as well as pancreatic and neural precursor cells (reviewed in (41)). In cancer, *VIM* is considered to have a pivotal role in the epithelial-to-mesenchymal transition and thereby in cells undergoing invasion and metastasis (42). Moreover, promoter methylation of *VIM* has been identified in several cancer types, including bladder, breast, cervical, colorectal, gastric, hepatocellular, esophageal, and pancreas (18, 43-48). For colorectal cancer, the frequent methylation of *VIM* is established and included in a non-invasive test using stool (41, 49, 50). Importantly, studies have shown that *VIM* has lost its expression already in normal colonic cells (51, 52). In concordance with this, a very low *VIM* expression is seen in both control samples and tumors from the TCGA data (supplementary figure 1). This implies that the silencing of *VIM* happens early and that the subsequent promoter hypermethylation in cancer may be a way to stably maintain this inactivation.

**Supplementary Table 1. Clinico-pathological features for fresh frozen and archival CCA samples**

| Sample series             | Tumor diagnosis | Liver disease | Tissue origin | Cancer status                                                                                     | Age | Gender | Operative procedure                   |
|---------------------------|-----------------|---------------|---------------|---------------------------------------------------------------------------------------------------|-----|--------|---------------------------------------|
| Fresh frozen              | CCA             | PSC           | ECC           | Tumor in main bile duct. Lymph node metastasis near coeliac artery                                | 50  | M      | Laparoscopy                           |
| Fresh frozen              | CCA             | None          | ECC           | Tumor in common hepatic duct, 25 mm                                                               | 72  | M      | Liver resection                       |
| Fresh frozen              | CCA             | None          | ECC           | Hilar tumor, 32 mm                                                                                | 66  | F      | Liver transplantation (Mayo protocol) |
| Fresh frozen              | CCA             | None          | ECC           | Tumor in common hepatic duct, 20 mm. Perineural- and vascular infiltration. Lymph node metastases | 67  | F      | Liver resection                       |
| Fresh frozen              | CCA             | None          | ECC           | Hilar tumor, 30 mm. Infiltration in liver tissue. Lymph node metastases                           | 60  | F      | Liver transplantation (Mayo protocol) |
| Fresh frozen <sup>#</sup> | CCA             | None          | ECC           | Adenocarcinoma                                                                                    | 70  | F      | Liver resection                       |
| Fresh frozen <sup>#</sup> | CCA             | None          | ECC           | Adenocarcinoma                                                                                    | 65  | F      | Liver resection                       |
| Fresh frozen <sup>#</sup> | CCA             | None          | ECC           | Adenocarcinoma                                                                                    | 61  | M      | Liver resection                       |
| Fresh frozen <sup>#</sup> | CCA             | None          | ECC           | Adenocarcinoma                                                                                    | 73  | M      | Liver resection                       |
| Fresh frozen              | CCA             | None          | ECC           | Hilar tumor. Perineural infiltration                                                              | 47  | F      | Laparotomy                            |
| Fresh frozen              | CCA             | PSC           | ECC           | Hilar tumor, 60 mm. Liver tissue-, perineural- and vascular infiltration                          | 43  | M      | Liver resection                       |
| Fresh frozen              | CCA             | None          | ECC           | Tumor in main bile duct, 25 mm. Infiltration in pancreas, duodenum and ampulla Vateri             | 76  | F      | Whipple`s operation                   |
| Fresh frozen              | CCA             | None          | ICC           | Intrahepatic tumor, too large for planned resection with auto-transplantation                     | 31  | F      | Laparotomy                            |
| Archive <sup>*</sup>      | CCA             | PSC           | ECC           | Lymph node metastases in hepatoduodenal ligament                                                  | 53  | M      | Laparotomy                            |
| Archive <sup>*</sup>      | CCA             | PSC           | ECC           | Lymph node metastases in hepatoduodenal ligament                                                  | 53  | M      | Laparotomy                            |
| Archive                   | CCA             | PSC           | ECC           | Hilar tumor, 18 mm                                                                                | 46  | M      | Liver transplantation                 |
| Archive                   | CCA             | PSC           | ECC           | Tumor in main bile duct. Perineural- and fatty tissue infiltration                                | 43  | M      | Liver transplantation                 |
| Archive <sup>*</sup>      | CCA             | PSC           | ECC           | Tumor in main bile duct. Perineural- and fatty tissue infiltration                                | 50  | M      | Liver transplantation                 |
| Archive <sup>*</sup>      | CCA             | PSC           | ECC           | Tumor in main bile duct. Perineural- and fatty tissue infiltration                                | 50  | M      | Liver transplantation                 |
| Archive                   | CCA             | PSC           | ECC           | Extrahepatic bile duct and pancreatic tissue with adenocarcinoma infiltration                     | 54  | M      | Liver transplantation                 |
| Archive <sup>*</sup>      | CCA             | PSC           | ICC           | Intrahepatic tumor, 100 mm. Lymph node metastasis                                                 | 32  | M      | Liver resection                       |

|          |     |      |     |                                                                                                                                 |    |   |                                       |
|----------|-----|------|-----|---------------------------------------------------------------------------------------------------------------------------------|----|---|---------------------------------------|
| Archive* | CCA | PSC  | ICC | Intrahepatic tumor, 100 mm. Lymph node metastasis                                                                               | 32 | M | Liver resection                       |
| Archive  | CCA | None | ECC | Hilar tumor, 30 mm. Liver tissue infiltration. Lymph node metastasis                                                            | 61 | F | Liver transplantation (Mayo protocol) |
| Archive* | CCA | None | ICC | Intrahepatic tumor, 30 mm. Perineural- and vascular infiltration. Lymph node metastasis                                         | 47 | M | Liver transplantation                 |
| Archive* | CCA | None | ICC | Intrahepatic tumor, 30 mm. Perineural- and vascular infiltration. Lymph node metastasis                                         | 47 | M | Liver transplantation                 |
| Archive  | CCA | PSC  | ECC | Adenocarcinoma infiltrating liver-, connective- and fatty tissue                                                                | 49 | M | Laparotomy                            |
| Archive* | CCA | PSC  | ICC | Tumor in left hepatic duct. Perineural- and perimuscular infiltration                                                           | 43 | M | Liver transplantation                 |
| Archive* | CCA | PSC  | ICC | Tumor in left hepatic duct. Perineural- and perimuscular infiltration                                                           | 43 | M | Liver transplantation                 |
| Archive  | CCA | PSC  | ICC | Adenocarcinoma infiltrating connective tissue (lig. falciforme)                                                                 | 65 | M | Laparotomy                            |
| Archive* | CCA | PSC  | ECC | Hilar tumor. Perineural- and perivascular infiltration. Lymph node metastasis                                                   | 54 | M | Liver transplantation                 |
| Archive* | CCA | PSC  | ECC | Hilar tumor. Perineural- and perivascular infiltration. Lymph node metastasis                                                   | 54 | M | Liver transplantation                 |
| Archive  | CCA | PSC  | ECC | Tumor in main bile duct and hepatic duct. Perineural- and vascular infiltration. Lymph node metastasis                          | 38 | M | Whipple`s operation                   |
| Archive* | CCA | None | ECC | Tumor in common hepatic duct, 25 mm                                                                                             | 72 | M | Liver resection                       |
| Archive* | CCA | None | ECC | Tumor in common hepatic duct, 25 mm                                                                                             | 72 | M | Liver resection                       |
| Archive* | CCA | None | ECC | Tumor in common hepatic duct, 25 mm                                                                                             | 72 | M | Liver resection                       |
| Archive  | CCA | None | ECC | Hilar tumor, 45 mm. Perineural infiltration                                                                                     | 61 | M | Liver transplantation                 |
| Archive* | CCA | None | ECC | Tumor in common hepatic duct, right and left hepatic ducts, 20 mm. Perineural- and vascular infiltration. Lymph node metastasis | 67 | F | Liver resection                       |
| Archive* | CCA | None | ECC | Tumor in common hepatic duct, right and left hepatic ducts, 20 mm. Perineural- and vascular infiltration. Lymph node metastasis | 67 | F | Liver resection                       |
| Archive  | CCA | None | ECC | Distal common bile duct. Infiltration through wall into connective and fatty tissue. Perineural infiltration                    | 70 | F | Liver transplantation                 |

All CCA samples are grouped according to their respective sample series, fresh frozen and archival samples. #Tumor samples are provided by Imperial College, London, UK. All other tumor samples are derived from Oslo University Hospital, Rikshospitalet, Oslo, Norway. \*Samples are derived from the same patient when they appear in a vertical sequential manner. Abbreviations: CCA, cholangiocarcinoma; ECC, extrahepatic cholangiocarcinoma; F, female; ICC, intrahepatic cholangiocarcinoma; M, male; PSC, primary sclerosing cholangitis.

**Supplementary Table 2. Clinico-pathologic features for non-malignant tissue samples**

| Sample series | Tumor diagnosis | Liver disease         | Tissue origin     | Age | Gender |
|---------------|-----------------|-----------------------|-------------------|-----|--------|
| Fresh frozen  | Non-malignant   | PSC                   | Peripheral liver  | 60  | M      |
| Fresh frozen  | Non-malignant   | PSC                   | Peripheral liver  | 63  | M      |
| Fresh frozen  | Non-malignant   | PSC                   | Peripheral liver  | 23  | M      |
| Fresh frozen  | Non-malignant   | PSC                   | Peripheral liver  | 35  | M      |
| Fresh frozen  | Non-malignant   | PSC                   | Peripheral liver  | 31  | M      |
| Fresh frozen  | Non-malignant   | PSC                   | Peripheral liver  | 32  | M      |
| Fresh frozen  | Non-malignant   | PSC                   | Peripheral liver  | 57  | M      |
| Fresh frozen  | Non-malignant   | PSC                   | Peripheral liver  | 36  | F      |
| Fresh frozen  | Non-malignant   | PSC                   | Peripheral liver  | 44  | F      |
| Fresh frozen  | Non-malignant   | Alcohol               | Peripheral liver  | 57  | M      |
| Fresh frozen  | Non-malignant   | Alcohol               | Peripheral liver  | 59  | M      |
| Fresh frozen  | Non-malignant   | Alcohol               | Peripheral liver  | 48  | M      |
| Fresh frozen  | Non-malignant   | PBC                   | Peripheral liver  | 40  | F      |
| Fresh frozen  | Non-malignant   | PBC                   | Peripheral liver  | 69  | F      |
| Fresh frozen  | Non-malignant   | Hemochromatosis       | Peripheral liver  | 51  | M      |
| Fresh frozen  | Non-malignant   | AIH                   | Peripheral liver  | 43  | F      |
| Fresh frozen  | Non-malignant   | AIH                   | Peripheral liver  | 32  | F      |
| Fresh frozen  | Non-malignant   | PBC                   | Peripheral liver  | 72  | F      |
| Fresh frozen  | Non-malignant   | Alcohol               | Peripheral liver  | 51  | M      |
| Fresh frozen  | Non-malignant   | Alcohol               | Peripheral liver  | 59  | M      |
| Fresh frozen  | Non-malignant   | Cryptogenic cirrhosis | Peripheral liver  | 62  | M      |
| Archive       | Non-malignant   | PSC                   | Peripheral liver* | 43  | M      |
| Archive       | Non-malignant   | PSC                   | Peripheral liver* | 43  | M      |
| Archive       | Non-malignant   | None                  | Peripheral liver* | 47  | M      |

|         |               |         |                        |    |   |
|---------|---------------|---------|------------------------|----|---|
| Archive | Non-malignant | PSC     | Extrahepatic bile duct | 17 | F |
| Archive | Non-malignant | PSC     | Peripheral liver       | 17 | F |
| Archive | Non-malignant | PSC     | Hilum of the liver     | 17 | F |
| Archive | Non-malignant | None    | Peripheral liver*      | 67 | F |
| Archive | Non-malignant | AIH     | Peripheral liver       | 45 | F |
| Archive | Non-malignant | AIH     | Hilum of the liver     | 45 | F |
| Archive | Non-malignant | None    | Peripheral liver*      | 60 | F |
| Archive | Non-malignant | PSC     | Extrahepatic bile duct | 27 | M |
| Archive | Non-malignant | PSC     | Peripheral liver       | 27 | M |
| Archive | Non-malignant | PSC     | Hilum of the liver     | 27 | M |
| Archive | Non-malignant | PSC     | Peripheral liver*      | 54 | M |
| Archive | Non-malignant | PSC     | Peripheral liver       | 71 | F |
| Archive | Non-malignant | PSC     | Extrahepatic bile duct | 71 | F |
| Archive | Non-malignant | PSC     | Hilum of the liver     | 71 | F |
| Archive | Non-malignant | PSC     | Peripheral liver*      | 43 | M |
| Archive | Non-malignant | PSC     | Hilum of the liver     | 65 | M |
| Archive | Non-malignant | PSC     | Peripheral liver       | 65 | M |
| Archive | Non-malignant | PSC     | Peripheral liver*      | 46 | M |
| Archive | Non-malignant | PBC     | Extrahepatic bile duct | 59 | F |
| Archive | Non-malignant | PBC     | Hilum of the liver     | 59 | F |
| Archive | Non-malignant | PBC     | Peripheral liver       | 59 | F |
| Archive | Non-malignant | AIH     | Peripheral liver       | 43 | F |
| Archive | Non-malignant | PSC     | Hilum of the liver     | 40 | M |
| Archive | Non-malignant | PSC     | Central liver          | 40 | M |
| Archive | Non-malignant | Alcohol | Hilum of the liver     | 57 | M |
| Archive | Non-malignant | PSC     | Extrahepatic bile duct | 60 | M |
| Archive | Non-malignant | PSC     | Hilum of the liver     | 60 | M |

|         |               |     |                    |    |   |
|---------|---------------|-----|--------------------|----|---|
| Archive | Non-malignant | PSC | Peripheral liver   | 60 | M |
| Archive | Non-malignant | PBC | Peripheral liver   | 40 | F |
| Archive | Non-malignant | AIH | Hilum of the liver | 32 | F |

All non-malignant samples are grouped according to their respective sample series, fresh frozen and archival samples. Samples are derived from the same patient when they appear in a vertical sequential manner joint by a line. \*Sample from explanted liver, from unaffected region distant from CCA. Abbreviations: AIH, autoimmune hepatitis; F, female; M, male; PBC, primary biliary cholangitis; PSC, primary sclerosing cholangitis. All non-malignant tissue samples are derived from Oslo University Hospital, Rikshospitalet, Oslo, Norway.

**Supplementary Table 3. Clinico-pathologic features for biliary brush samples**

| Sample series | Sample number | Tumor diagnosis | Liver disease | Tissue origin | Cancer status                                                                                          | Cytology score | Age | Gender | Operative procedure                   |
|---------------|---------------|-----------------|---------------|---------------|--------------------------------------------------------------------------------------------------------|----------------|-----|--------|---------------------------------------|
| Biliary brush | 1a            | CCA             | PSC           | ECC           | Lymph node metastases in hepatoduodenal ligament                                                       | 1 (N/D)        | 40  | M      | Laparotomy                            |
| Biliary brush | 1b            | CCA             | PSC           | ECC           | Lymph node metastases in hepatoduodenal ligament                                                       | 1 (N/D)        | 40  | M      | Laparotomy                            |
| Biliary brush | 2             | CCA             | None          | ECC           | CT/PET scan and ERCP compatible with cholangiocarcinoma. Lymph node metastasis (cytology)              | 5              | 35  | M      | None                                  |
| Biliary brush | 3             | CCA             | PSC           | ICC           | CT/PET scan and ERCP compatible with cholangiocarcinoma. Skeletal metastases. No biopsy                | 4              | 53  | M      | None                                  |
| Biliary brush | 4a            | CCA             | None          | ECC           | Tumor in distal main bile duct. Connective tissue-, fatty tissue- and perineural infiltration          | 2              | 70  | F      | Liver transplantation                 |
| Biliary brush | 4b            | CCA             | None          | ECC           | Tumor in distal main bile duct. Connective tissue-, fatty tissue- and perineural infiltration          | N/A            | 70  | F      | Liver transplantation                 |
| Biliary brush | 5             | CCA             | PSC           | ECC           | Tumor in main bile duct and hepatic duct. Perineural- and vascular infiltration. Lymph node metastasis | 5 and 3*       | 38  | M      | Whipple`s operation                   |
| Biliary brush | 6             | CCA             | None          | ECC           | Hilar tumor, 30 mm. Liver tissue infiltration. Lymph node metastasis                                   | 4              | 60  | F      | Liver transplantation (Mayo protocol) |
| Biliary brush | 7             | CCA             | None          | ECC           | Hilar tumor. Perineural infiltration                                                                   | 1 (N/C)        | 47  | F      | Laparotomy                            |
| Biliary brush | 8             | CCA             | PSC           | ECC           | Tumor in main bile duct. Lymph node metastasis                                                         | 5              | 50  | M      | Laparoscopy                           |
| Biliary brush | 9             | CCA             | PSC           | ICC           | Intrahepatic tumor, 15 mm, close to the hilum                                                          | 4              | 55  | M      | Liver transplantation                 |

|               |     |     |                 |               |                                                                                                                                              |          |    |   |                                       |
|---------------|-----|-----|-----------------|---------------|----------------------------------------------------------------------------------------------------------------------------------------------|----------|----|---|---------------------------------------|
| Biliary brush | 10a | CCA | PSC             | ICC           | Intrahepatic tumor, 100 mm. Lymph node metastasis                                                                                            | N/A      | 32 | M | Liver resection                       |
| Biliary brush | 10b | CCA | PSC             | ICC           | Intrahepatic tumor, 100 mm. Lymph node metastasis                                                                                            | N/A      | 32 | M | Liver resection                       |
| Biliary brush | 11  | CCA | PSC             | ECC           | Hilar tumor, 60 mm. Liver tissue-, perineural- and vascular infiltration                                                                     | 1 (N/D)  | 43 | M | Liver resection                       |
| Biliary brush | 12  | CCA | None            | ECC           | Hilar tumor, 32 mm                                                                                                                           | 4 and 3* | 66 | F | Liver transplantation (Mayo protocol) |
| Biliary brush | 13  | CCA | PSC             | ICC           | Intrahepatic tumor 50 mm. Lymph node metastasis (cytology)                                                                                   | 5        | 66 | M | None                                  |
| Biliary brush | 14  | CCA | Not typical PSC | ICC/ECC       | CT: suspicious intrahepatic tumor. PET scan: compatible with CCA in common hepatic duct and main bile duct. Lymph node metastasis (cytology) | 5        | 35 | M | None                                  |
| Biliary brush | 15  | CCA | PSC             | ICC and hilum | Lymph node metastases                                                                                                                        | 4        | 40 | M | Laparotomy                            |
| Biliary brush | 16  | CCA | PSC             | ICC and hilum | CT/PET scan compatible with CCA with lymph node metastases. Suspected skeletal metastases. No biopsy                                         | 4        | 53 | M | None                                  |
| Biliary brush | 17  | CCA | PSC             | ICC           | Intrahepatic CCA in explanted liver. BilIN 3 in extrahepatic bile duct close to the hilum                                                    | 3        | 56 | M | Liver transplantation                 |
| Biliary brush | 18a | CCA | PSC             | ECC           | Hilar tumor, 50 mm x 17 mm. Lymph node metastasis.                                                                                           | 4        | 55 | M | Liver transplantation                 |
| Biliary brush | 18b | CCA | PSC             | ECC           | Hilar tumor, 50 mm x 17 mm. Lymph node metastasis.                                                                                           | 4        | 55 | M | Liver transplantation                 |
| Biliary brush | 19  | CCA | None            | ECC           | Biopsy via percutaneous transhepatic cholangiography                                                                                         | 5        | 82 | F | None                                  |
| Biliary brush | 20a | CCA | None            | Hilar         | Hilar tumor, 32 mm                                                                                                                           | 5        | 66 | F | Liver transplantation (Mayo protocol) |
| Biliary brush | 20b | CCA | None            | Hilar         | Hilar tumor, 32 mm                                                                                                                           | 5        | 66 | F | Liver transplantation (Mayo protocol) |
| Biliary brush | 21  | CCA | None            | ECC           | Lymph node metastasis                                                                                                                        | 5        | 48 | M | Laparotomy                            |
| Biliary brush | 22  | CCA | PSC             | ICC           | Liver biopsy with infiltration of adenocarcinoma                                                                                             | 5        | 43 | M | None                                  |
| Biliary brush | 23  | CCA | None            | Hilum         | Hilar tumor by MRCP and ERCP. No biopsy                                                                                                      | 5        | 47 | F | None                                  |
| Biliary brush | 24  | CCA | None            | ECC and hilar | Peritoneal metastasis (biopsy)                                                                                                               | 5        | 64 | M | None                                  |
| Biliary brush | 25  | CCA | None            | ECC and hilar | ERCP with biopsy                                                                                                                             | 5        | 77 | M | None                                  |
| Biliary brush | 26a | CCA | Noe             | Hilum         | Hilar tumor by MRCP, CT and ERCP. No biopsy                                                                                                  | 5        | 75 | M | None                                  |

|               |     |     |      |                 |                                                                                                     |         |    |   |                       |
|---------------|-----|-----|------|-----------------|-----------------------------------------------------------------------------------------------------|---------|----|---|-----------------------|
| Biliary brush | 26b | CCA | None | Hilum           | Hilar tumor by MRCP, CT and ERCP. No biopsy                                                         | 5       | 75 | M | None                  |
| Biliary brush | 27  | CCA | None | ECC             | Tumor in distal extrahepatic bile duct with infiltration into pancreas and duodenum                 | 5       | 69 | F | Whipple`s operation   |
| Biliary brush | 28  | CCA | None | ECC             | ERCP compatible with CCA. No biopsy                                                                 | 5       | 83 | F | None                  |
| Biliary brush | 29  | CCA | None | ECC             | Tumor in distal extrahepatic bile duct with infiltration into pancreas, duodenum and papilla Vateri | 5       | 79 | M | Whipple`s operation   |
| Biliary brush | 30  | CCA | PSC  | ECC             | Lymph node metastases                                                                               | 5       | 35 | M | Laparotomy            |
| Biliary brush | 31  | CCA | PSC  | ICC             | Tumor, 70 mm, right liver lobe. Biopsy                                                              | 2       | 61 | M | None                  |
| Biliary brush | 32  | CCA | PSC  | Hilar           | Lymph node metastases                                                                               | 3       | 53 | M | Liver transplantation |
| Biliary brush | 33  | CCA | None | ICC and hilum   | Liver biopsy with infiltration of adenocarcinoma. Lymph node metastases                             | 1 (N/D) | 61 | F | None                  |
| Biliary brush | 34  | CCA | None | Hilar           | CT, ERCP and MRCP compatible with CCA. No biopsy                                                    | N/A     | 64 | M | None                  |
| Biliary brush | 35  | CCA | PSC  | ICC and hilum   | CT and ERCP compatible with CCA. No biopsy                                                          | 2       | 71 | M | None                  |
| Biliary brush | 36  | CCA | PSC  | Peritoneum      | ERCP compatible with CCA. Peritoneal carcinomatosis                                                 | 1 (N/C) | 71 | M | Laparotomy            |
| Biliary brush | 37a | CCA | PSC  | ICC and hilum   | Lymph node metastases                                                                               | 3       | 56 | M | Liver resection       |
| Biliary brush | 37b | CCA | PSC  | ICC and hilum   | Lymph node metastases                                                                               | 4       | 56 | M | Liver resection       |
| Biliary brush | 38  | CCA | PSC  | ICC             | Tumor, 90 mm, right liver lobe. Biopsy                                                              | 2       | 43 | M | None                  |
| Biliary brush | 39  | CCA | PSC  | Hilar           | Lymph node metastases                                                                               | N/A     | 55 | F | Laparotomy            |
| Biliary brush | 40  | CCA | PSC  | Hilar           | Intrahepatic metastases                                                                             | 3       | 55 | F | Laparotomy            |
| Biliary brush | 41  | CCA | PSC  | Hilar           | Lymph node metastasis                                                                               | 4       | 40 | M | Liver transplantation |
| Biliary brush | 42  | CCA | PSC  | ECC             | Peritoneal carcinomatosis                                                                           | 2       | 41 | M | Laparotomy            |
| Biliary brush | 1   | GBC | PSC  | Gall bladder    | Lymph node metastasis                                                                               | 2       | 58 | M | Laparotomy            |
| Biliary brush | 2   | GBC | None | Gall bladder    | Peritoneal metastases                                                                               | 5       | 59 | M | Laparotomy            |
| Biliary brush | 3   | GBC | None | Gall bladder    | Lymph node metastases                                                                               | 2       | 79 | F | Laparotomy            |
| Biliary brush | 4   | GBC | PSC  | Gall bladder    | Lymph node metastases                                                                               | 2       | 54 | M | Laparotomy            |
| Biliary brush | 5   | GBC | PSC  | Gall bladder    | Gall bladder adenocarcinoma with local infiltration                                                 | 3       | 67 | M | Liver transplantation |
| Biliary brush | 1   | PC  | None | ECC or pancreas | Tumor in caput pancreatis                                                                           | 5       | 48 | M | Laparotomy            |

| Biliary brush | 2  | PC            | None | Pancreas | Pancreatic cancer with liver and lung metastases. Biopsy from tumor and lung metastasis | 5 | 63 | M | None                          |
|---------------|----|---------------|------|----------|-----------------------------------------------------------------------------------------|---|----|---|-------------------------------|
| Biliary brush | 3a | PC            | PSC  | Pancreas | Lymph node metastasis                                                                   | 2 | 60 | M | Laparotomy                    |
| Biliary brush | 3b | PC            | PSC  | Pancreas | Lymph node metastasis                                                                   | 3 | 60 | M | Laparotomy                    |
|               |    |               |      |          |                                                                                         |   |    |   | <b>Follow up<br/>(months)</b> |
| Biliary brush | 1  | Non-malignant | PSC  | -        | -                                                                                       | 2 | 36 | M | 36                            |
| Biliary brush | 2  | Non-malignant | PSC  | -        | -                                                                                       | 2 | 26 | F | 43                            |
| Biliary brush | 3  | Non-malignant | PSC  | -        | -                                                                                       | 3 | 34 | M | 41                            |
| Biliary brush | 4  | Non-malignant | PSC  | -        | -                                                                                       | 2 | 24 | M | 24                            |
| Biliary brush | 5  | Non-malignant | PSC  | -        | -                                                                                       | 2 | 38 | M | 41                            |
| Biliary brush | 6  | Non-malignant | PSC  | -        | -                                                                                       | 2 | 35 | M | 41                            |
| Biliary brush | 7  | Non-malignant | PSC  | -        | -                                                                                       | 2 | 45 | M | 49                            |
| Biliary brush | 8  | Non-malignant | PSC  | -        | -                                                                                       | 2 | 35 | M | 34                            |
| Biliary brush | 9  | Non-malignant | PSC  | -        | -                                                                                       | 2 | 46 | F | 41                            |
| Biliary brush | 10 | Non-malignant | PSC  | -        | -                                                                                       | 2 | 37 | M | 42                            |
| Biliary brush | 11 | Non-malignant | PSC  | -        | -                                                                                       | 2 | 36 | F | 43                            |
| Biliary brush | 12 | Non-malignant | PSC  | -        | -                                                                                       | 2 | 18 | M | 49                            |
| Biliary brush | 13 | Non-malignant | PSC  | -        | -                                                                                       | 2 | 43 | M | 40                            |
| Biliary brush | 14 | Non-malignant | PSC  | -        | -                                                                                       | 2 | 40 | F | 47                            |
| Biliary brush | 15 | Non-malignant | PSC  | -        | -                                                                                       | 2 | 46 | M | 45                            |
| Biliary brush | 16 | Non-malignant | PSC  | -        | -                                                                                       | 2 | 41 | M | 24                            |
| Biliary brush | 17 | Non-malignant | PSC  | -        | -                                                                                       | 2 | 27 | M | 43                            |
| Biliary brush | 18 | Non-malignant | PSC  | -        | -                                                                                       | 2 | 31 | M | 42                            |
| Biliary brush | 19 | Non-malignant | PSC  | -        | -                                                                                       | 2 | 43 | F | 47                            |
| Biliary brush | 20 | Non-malignant | PSC  | -        | -                                                                                       | 2 | 18 | M | 49                            |

|               |     |               |                   |   |                               |   |    |   |       |
|---------------|-----|---------------|-------------------|---|-------------------------------|---|----|---|-------|
| Biliary brush | 21  | Non-malignant | PSC               | - | -                             | 2 | 53 | F | 13    |
| Biliary brush | 22a | Non-malignant | PSC               | - | -                             | 2 | 50 | M | 31    |
| Biliary brush | 22b | Non-malignant | PSC               | - | -                             | 2 | 50 | M | 31    |
| Biliary brush | 23  | Non-malignant | PSC               | - | -                             | 2 | 59 | M | 36    |
| Biliary brush | 24a | Non-malignant | PSC               | - | -                             | 2 | 49 | M | 44    |
| Biliary brush | 24b | Non-malignant | PSC               | - | -                             | 2 | 49 | M | 44    |
| Biliary brush | 25  | Non-malignant | PSC               | - | -                             | 2 | 27 | M | 57    |
| Biliary brush | 26  | Non-malignant | PSC               | - | Liver transplantation, no CCA | 2 | 30 | M | Alive |
| Biliary brush | 27  | Non-malignant | PSC               | - | Liver transplantation, no CCA | 2 | 37 | M | Alive |
| Biliary brush | 28a | Non-malignant | PSC               | - | -                             | 2 | 43 | M | 52    |
| Biliary brush | 28b | Non-malignant | PSC               | - | -                             | 2 | 43 | M | 52    |
| Biliary brush | 29  | Non-malignant | PSC               | - | -                             | 2 | 30 | M | 51    |
| Biliary brush | 30  | Non-malignant | PSC               | - | -                             | 2 | 16 | M | 49    |
| Biliary brush | 31  | Non-malignant | PSC               | - | -                             | 2 | 19 | M | 44    |
| Biliary brush | 32  | Non-malignant | PSC               | - | -                             | 2 | 62 | M | 44    |
| Biliary brush | 33  | Non-malignant | PSC               | - | -                             | 2 | 57 | M | 41    |
| Biliary brush | 34  | Non-malignant | PSC               | - | -                             | 2 | 41 | M | 38    |
| Biliary brush | 35  | Non-malignant | PSC               | - | -                             | 2 | 47 | F | 33    |
| Biliary brush | 36  | Non-malignant | Small-duct<br>PSC | - | -                             | 2 | 27 | M | 30    |
| Biliary brush | 37  | Non-malignant | PSC               | - | -                             | 2 | 45 | M | 27    |
| Biliary brush | 38  | Non-malignant | PSC               | - | -                             | 2 | 38 | M | 27    |
| Biliary brush | 39  | Non-malignant | PSC               | - | -                             | 2 | 30 | M | 58    |
| Biliary brush | 40  | Non-malignant | PSC               | - | Liver transplantation, no CCA | 2 | 34 | M | Alive |
| Biliary brush | 41  | Non-malignant | PSC               | - | Liver transplantation, no CCA | 2 | 57 | M | Alive |
| Biliary brush | 42  | Non-malignant | PSC               | - | -                             | 3 | 20 | M | 57    |
| Biliary brush | 43  | Non-malignant | PSC               | - | -                             | 3 | 29 | M | 51    |

|               |     |               |     |   |                                                                  |   |    |   |       |
|---------------|-----|---------------|-----|---|------------------------------------------------------------------|---|----|---|-------|
| Biliary brush | 44  | Non-malignant | PSC | - | -                                                                | 2 | 23 | M | 51    |
| Biliary brush | 45  | Non-malignant | PBC | - | -                                                                | 2 | 48 | K | 49    |
| Biliary brush | 46  | Non-malignant | PSC | - | Liver transplantation, no CCA                                    | 2 | 44 | F | Alive |
| Biliary brush | 47  | Non-malignant | PSC | - | Liver transplantation, no CCA                                    | 4 | 33 | M | Alive |
| Biliary brush | 48  | Non-malignant | PSC | - | Liver transplantation, no CCA                                    | 2 | 48 | M | Alive |
| Biliary brush | 49  | Non-malignant | PSC | - | -                                                                | 2 | 50 | F | 50    |
| Biliary brush | 50a | Non-malignant | PSC | - | Liver transplantation. Some dysplastic nodules in liver, not HCC | 2 | 35 | M | Alive |
| Biliary brush | 50b | Non-malignant | PSC | - | Liver transplantation. Some dysplastic nodules in liver, not HCC | 2 | 35 | M | Alive |

All biliary brush samples are grouped in numerical order and followed by A and B when multiple samples were obtained from the same patient. Cytology scoring was performed according to published criteria (53): Category 1 was denoted when material was insufficient for analysis. Categories 2 (normal epithelium and/or irregular non-dysplastic changes) and 3 (indefinite for dysplasia) were considered to be negative whereas categories 4 (low-grade dysplasia) and 5 (high-grade dysplasia/adenocarcinoma) were considered to be positive, indicating the presence of CCA. \*Cytology was performed on two parallel brushes, and the most severe category was used in comparison with the biomarker-panel. Abbreviations: CCA, cholangiocarcinoma; CT, computed tomography; ECC, extrahepatic cholangiocarcinoma; ERCP, endoscopic retrograde cholangiopancreatography; F, female; HCC, hepatocellular carcinoma; ICC, intrahepatic cholangiocarcinoma; M, male; MRCP, magnetic resonance cholangiopancreatography; N/A, not available; N/C, not enough cells present for analysis; N/D, no data (most likely due to presence of bacteria and fungi) ; PET, positron emission tomography; PSC, primary sclerosing cholangitis.

**Supplementary Table 4. Assays used for quantitative methylation-specific polymerase chain reaction (qMSP)**

| Assay       | Sense primer                            | Antisense primer                     | Probe                     | Frg. size<br>(bp) | Number of assayed<br>CpG sites | Ref. |
|-------------|-----------------------------------------|--------------------------------------|---------------------------|-------------------|--------------------------------|------|
| ALU qMSP    | GGTTAGGTATAGTGGTTTATATTGTA<br>ATTTTAGTA | ATTAACATAACTAATCTAAACTCCT<br>AACCTCA | 6FAM-CCTACCTTAACCTCCC-MGB | 98                | -                              | (54) |
| CDO1 qMSP   | CGAATTATAGCGGCGGAGGT                    | AAATCGCGTAAACTCCGCG                  | 6FAM-CGTTAGGTCGGGCGGT-MGB | 101               | 10                             | (1)  |
| CNRIP1 qMSP | TTTAGTTGCGCGGATTTCG                     | GCACCCGAAAACCTCGCTCTA                | 6FAM-CCGCAAACCGCCG-MGB    | 55                | 8                              | (55) |
| DCLK1 qMSP  | GCGCGTACGCGGAGG                         | CGACGACGAACGCGCT                     | 6FAM-CGGGAGGGCGTGTGA-MGB  | 86                | 11                             | (1)  |

|              |                            |                         |                                  |     |    |      |
|--------------|----------------------------|-------------------------|----------------------------------|-----|----|------|
| FBN1 qMSP    | GAGTTATAGTTGGGATAGTTGCGAGC | AACGACGACTCCGACTCCC     | 6FAM-CGCTACAACCACTACTCGA-MGB     | 101 | 8  | (55) |
| INA qMSP     | AAAAGTCGGGCGTATCGTTTC      | CGACTTCAACGCGAACTACAAA  | 6FAM-ATACGACAAACAAAACGCGA-MGB    | 75  | 10 | (55) |
| MAL qMSP     | CGTTTAGGTTATTGGGTTTCGC     | CGAACGCCGCTCAAACCTC     | 6FAM-CGCAAACCTCTCGCTAA-MGB       | 63  | 8  | (55) |
| SEPT9 qMSP   | CGCGCGATTCTGTTTATTATTA     | CCAACCCAACACCCACCTT     | 6FAM-GGATTTCGCGGTTAAC-MGB        | 98  | 7  | (56) |
| SFRP1 qMSP   | GAATTCGTTTCGCGAGGGA        | AAACGAACCGCACTCGTTACC   | 6FAM-CGTCACCGACGCGAA-MGB         | 70  | 10 | (1)  |
| SNCA qMSP    | GCGTTTTGGGCGTTTTTTTAC      | CGCTATAAACCGACGACGC     | 6FAM-CGCTAACCTATCGTCGAA-MGB      | 143 | 11 | (55) |
| SPG20 qMSP   | GCGCGTCGTGGAACGT           | CTACGCTCGCCGAAAACC      | 6FAM-CGCGCTTACCGTAACAA-MGB       | 84  | 10 | (55) |
| TMEFF2 qMSP  | GTTTCGGGTTACGCGC           | TTCGCTCACTCTCCGCT       | 6FAM-TCGGATTTCGTTTTCGGTAG-MGB    | 83  | 9  | (44) |
| VIM qMSP     | GGTCGAGTTTATAGTCGGAGTTACGT | CCCGAAAACGAAACGTAAAACTA | 6FAM-CGTATTTATAGTTTGGGTAGCGC-MGB | 106 | 9  | (19) |
| ZSCAN18 qMSP | CGCGGTATAGTTTCGCGGTAT      | CGCGATAACGACCGACAAA     | 6FAM-CGTAGTTCGCGGTGAGG-MGB       | 84  | 11 | (1)  |

**Supplementary Table 5. Individual scoring thresholds used for scoring methylation in the respective sample sets**

| Type of samples | Sample set    | CDO1 | CNRIP1 | DCLK1 | FBN1 | INA | MAL | SEPT9 | SFRP1 | SNCA | SPG20 | TMEFF2 | VIM | ZSCAN18 |
|-----------------|---------------|------|--------|-------|------|-----|-----|-------|-------|------|-------|--------|-----|---------|
| Tissue samples  | Fresh frozen  | 1    | 1      | 2     | 1    | 1   | 1   | 1     | 1     | 1    | 1     | 1      | 1   | 1       |
|                 | FPET          | 2    | 1      | 2     | 1    | 1   | 4   | 1     | 5     | 1    | 2     | 4      | 1   | 3       |
| Brush samples   | Biliary brush | 5    | 3      | 10    | 1    | 1   | 7   | 1     | 7     | 3    | 3     | 6      | 3   | 8       |

The individual scoring thresholds were set based on the highest PMR value in non-malignant controls in the different sample sets. PMR values above the thresholds listed were scored positive for methylation. FPET; formalin-fixed paraffin-embedded tissue.

**Supplementary Table 6. Individual methylation sensitivities for all candidate genes in tissue samples**

| Tissue sample set      | CDO1 <sup>#</sup> | CNRIP1 | DCLK1 <sup>#</sup> | FBN1 | INA  | MAL  | SEPT9 <sup>*</sup> | SFRP1 <sup>#</sup> | SNCA | SPG20 | TMEFF2 <sup>*</sup> | VIM <sup>*</sup> | ZSCAN18 <sup>#</sup> |
|------------------------|-------------------|--------|--------------------|------|------|------|--------------------|--------------------|------|-------|---------------------|------------------|----------------------|
| Fresh frozen samples   | 85 %              | 77 %   | 46 %               | 31 % | 38 % | 85 % | 25%                | 69 %               | 62 % | 46 %  | 67%                 | 42%              | 77 %                 |
| Formalin fixed samples | 73 %              | 85 %   | 42 %               | 12 % | 27 % | 77 % | 27%                | 54 %               | 15 % | 58 %  | 77%                 | 35%              | 42 %                 |
| All samles             | 77 %              | 82 %   | 44 %               | 18 % | 31 % | 79 % | 26%                | 59 %               | 31 % | 54 %  | 73%                 | 37%              | 54 %                 |

All methylation sensitivities are listed with 100% specificity. <sup>#</sup> previously published results.(1) <sup>\*</sup> Data missing for one CCA.

### **Supplementary Figure legends**

**Supplementary Figure 1. Gene expression of a) *CDO1* b) *CNRIP1* c) *SEPT9* and d) *VIM* in publically available CCA and normal samples.** RNAseq version 2 data was obtained from the TCGA Research Network (<http://cancergenome.nih.gov/>), where the samples had been analyzed using the Illumina HiSeq platform. A total of 36 CCAs and nine matching normals were available for analysis. *P*-values were obtained using Mann-Whitney U test (all samples), and wilcoxon rank test (matching samples).  
\*Only values annotated to hg19 were applied.

**Supplementary Figure 2. qMSP traces of biliary brush samples.** Representative amplification plots of cholangiocarcinomas (left, red) and non-malignant control (right, green) brushings separated according to their Ct-values for a) *CDO1* b) *CNRIP1* c) *SEPT9* and d) *VIM*

**Supplementary Figure 3. Comparing the performance of the epi-panel in gallbladder (GBC) and pancreatic (PC) cancer with that of conventional cytology in biliary brush samples.** For the epi-panel (*CDO1*, *CNRIP1*, *SEPT9*, and *VIM*) see the following color code: Red; methylated, Green; unmethylated, Gray; no data. For cytology: Closed circle; positive, open circle; negative (scored according to (53)), N/A; not available, N/C; not enough cells present for analysis, N/D; no data.

**Supplementary Figure 4. Epi-panel status in corresponding brush and tissue samples.** Red; methylation, Green; unmethylated.

1. Andresen K, Boberg KM, Vedeld HM, Honne H, Hektoen M, Wadsworth CA, Clausen OP, et al. Novel target genes and a valid biomarker panel identified for cholangiocarcinoma. *Epigenetics* 2012;7:1249-57.
2. Heafield MT, Fearn S, Steventon GB, Waring RH, Williams AC, Sturman SG. Plasma cysteine and sulphate levels in patients with motor neurone, Parkinson's and Alzheimer's disease. *Neurosci Lett* 1990;110:216-220.
3. Brait M, Ling S, Nagpal JK, Chang X, Park HL, Lee J, Okamura J, et al. Cysteine dioxygenase 1 is a tumor suppressor gene silenced by promoter methylation in multiple human cancers. *PLoS One* 2012;7:e44951.
4. McCoy JG, Bailey LJ, Bitto E, Bingman CA, Aceti DJ, Fox BG, Phillips GN, Jr. Structure and mechanism of mouse cysteine dioxygenase. *Proc Natl Acad Sci U S A* 2006;103:3084-3089.
5. Satsu H, Terasawa E, Hosokawa Y, Shimizu M. Functional characterization and regulation of the taurine transporter and cysteine dioxygenase in human hepatoblastoma HepG2 cells. *Biochem J* 2003;375:441-447.
6. Jeschke J, O'Hagan HM, Zhang W, Vatapalli R, Calmon MF, Danilova L, Nelkenbrecher C, et al. Frequent inactivation of cysteine dioxygenase type 1 contributes to survival of breast cancer cells and resistance to anthracyclines. *Clin Cancer Res* 2013;19:3201-3211.
7. De Carvalho DD, Sharma S, You JS, Su SF, Taberlay PC, Kelly TK, Yang X, et al. DNA methylation screening identifies driver epigenetic events of cancer cell survival. *Cancer Cell* 2012;21:655-667.
8. Prabhu A, Sarcar B, Kahali S, Yuan Z, Johnson JJ, Adam KP, Kensicki E, et al. Cysteine catabolism: a novel metabolic pathway contributing to glioblastoma growth. *Cancer Res* 2014;74:787-796.
9. Tsuboyama-Kasaoka N, Hosokawa Y, Kodama H, Matsumoto A, Oka J, Totani M. Human cysteine dioxygenase gene: structural organization, tissue-specific expression and downregulation by phorbol 12-myristate 13-acetate. *Biosci Biotechnol Biochem* 1999;63:1017-1024.
10. Vedeld HM, Andresen K, Eilertsen I, Nesbakken A, Seruca R, Gladhaug I, Thiis-Evensen E, et al. The novel colorectal cancer biomarkers CDO1, ZSCAN18 and ZNF331 are frequently methylated across gastrointestinal cancers. *Int J Cancer* 2014.
11. Wrangle J, Machida EO, Danilova L, Hulbert A, Franco N, Zhang W, Glockner SC, et al. Functional identification of cancer-specific methylation of CDO1, HOXA9, and TAC1 for the diagnosis of lung cancer. *Clin Cancer Res* 2014;20:1856-1864.
12. Niehaus JL, Liu Y, Wallis KT, Egertova M, Bhartur SG, Mukhopadhyay S, Shi S, et al. CB1 cannabinoid receptor activity is modulated by the cannabinoid receptor interacting protein CRIP 1a. *Mol Pharmacol* 2007;72:1557-1566.
13. Lind GE, Kleivi K, Meling GI, Teixeira MR, Thiis-Evensen E, Rognum TO, Lothe RA. ADAMTS1, CRABP1, and NR3C1 identified as epigenetically deregulated genes in colorectal tumorigenesis. *Cell Oncol* 2006;28:259-272.
14. Lind GE, Danielsen SA, Ahlquist T, Merok MA, Andresen K, Skotheim RI, Hektoen M, et al. Identification of an epigenetic biomarker panel with high sensitivity and specificity for colorectal cancer and adenomas. *Mol Cancer* 2011;10:85.
15. Bethge N, Lothe RA, Honne H, Andresen K, Troen G, Eknaes M, Liestol K, et al. Colorectal cancer DNA methylation marker panel validated with high performance in Non-Hodgkin lymphoma. *Epigenetics* 2014;9:428-436.

16. Oster B, Thorsen K, Lamy P, Wojdacz TK, Hansen LL, Birkenkamp-Demtroder K, Sorensen KD, et al. Identification and validation of highly frequent CpG island hypermethylation in colorectal adenomas and carcinomas. *Int J Cancer* 2011;129:2855-2866.
17. Chong Y, Mia-Jan K, Ryu H, Abdul-Ghafar J, Munkhdelger J, Lkhagvadorj S, Jung SY, et al. DNA methylation status of a distinctively different subset of genes is associated with each histologic Lauren classification subtype in early gastric carcinogenesis. *Oncol Rep* 2014;31:2535-2544.
18. Moinova H, Leidner RS, Ravi L, Lutterbaugh J, Barnholtz-Sloan JS, Chen Y, Chak A, et al. Aberrant vimentin methylation is characteristic of upper gastrointestinal pathologies. *Cancer Epidemiol Biomarkers Prev* 2012;21:594-600.
19. Lind GE, Ahmed D, Lothe RA. Vimentin in Upper Gastrointestinal Pathologies - Letter. *Cancer Epidemiol Biomarkers Prev* 2012;21:1889.
20. Taniguchi H, Yamamoto H, Hirata T, Miyamoto N, Oki M, Nosho K, Adachi Y, et al. Frequent epigenetic inactivation of Wnt inhibitory factor-1 in human gastrointestinal cancers. *Oncogene* 2005;24:7946-7952.
21. McDade SS, Hall PA, Russell SE. Translational control of SEPT9 isoforms is perturbed in disease. *Hum Mol Genet* 2007;16:742-752.
22. McIlhatton MA, Burrows JF, Donaghy PG, Chanduloy S, Johnston PG, Russell SE. Genomic organization, complex splicing pattern and expression of a human septin gene on chromosome 17q25.3. *Oncogene* 2001;20:5930-5939.
23. Sellin ME, Sandblad L, Stenmark S, Gullberg M. Deciphering the rules governing assembly order of mammalian septin complexes. *Mol Biol Cell* 2011;22:3152-3164.
24. Mostowy S, Cossart P. Septins: the fourth component of the cytoskeleton. *Nat Rev Mol Cell Biol* 2012;13:183-194.
25. Bennett KL, Karpenko M, Lin MT, Claus R, Arab K, Dyckhoff G, Plinkert P, et al. Frequently methylated tumor suppressor genes in head and neck squamous cell carcinoma. *Cancer Res* 2008;68:4494-4499.
26. Burrows JF, Chanduloy S, McIlhatton MA, Nagar H, Yeates K, Donaghy P, Price J, et al. Altered expression of the septin gene, SEPT9, in ovarian neoplasia. *J Pathol* 2003;201:581-588.
27. Connolly D, Yang Z, Castaldi M, Simmons N, Oktay MH, Coniglio S, Fazzari MJ, et al. Septin 9 isoform expression, localization and epigenetic changes during human and mouse breast cancer progression. *Breast Cancer Res* 2011;13:R76.
28. Gulen T, Yakut T, Karkucak M, Baytan B, Gunes AM. AML1 amplification and 17q25 deletion in a case of childhood acute lymphoblastic leukemia. *J Clin Lab Anal* 2009;23:368-371.
29. Scott M, Hyland PL, McGregor G, Hillan KJ, Russell SE, Hall PA. Multimodality expression profiling shows SEPT9 to be overexpressed in a wide range of human tumours. *Oncogene* 2005;24:4688-4700.
30. Scott M, McCluggage WG, Hillan KJ, Hall PA, Russell SE. Altered patterns of transcription of the septin gene, SEPT9, in ovarian tumorigenesis. *Int J Cancer* 2006;118:1325-1329.
31. Tanaka M, Kijima H, Itoh J, Matsuda T, Tanaka T. Impaired expression of a human septin family gene Bradeion inhibits the growth and tumorigenesis of colorectal cancer in vitro and in vivo. *Cancer Gene Ther* 2002;9:483-488.

32. Church TR, Wandell M, Lofton-Day C, Mongin SJ, Burger M, Payne SR, Castanos-Velez E, et al. Prospective evaluation of methylated SEPT9 in plasma for detection of asymptomatic colorectal cancer. *Gut* 2014;63:317-325.
33. Toth K, Galamb O, Spisak S, Wichmann B, Sipos F, Valcz G, Leiszter K, et al. The influence of methylated septin 9 gene on RNA and protein level in colorectal cancer. *Pathol Oncol Res* 2011;17:503-509.
34. Amir S, Golan M, Mabjeesh NJ. Targeted knockdown of SEPT9\_v1 inhibits tumor growth and angiogenesis of human prostate cancer cells concomitant with disruption of hypoxia-inducible factor-1 pathway. *Mol Cancer Res* 2010;8:643-652.
35. Kakehashi A, Ishii N, Shibata T, Wei M, Okazaki E, Tachibana T, Fukushima S, et al. Mitochondrial prohibitins and septin 9 are implicated in the onset of rat hepatocarcinogenesis. *Toxicol Sci* 2011;119:61-72.
36. Mendez MG, Kojima S, Goldman RD. Vimentin induces changes in cell shape, motility, and adhesion during the epithelial to mesenchymal transition. *FASEB J* 2010;24:1838-1851.
37. Mor-Vaknin N, Punturieri A, Sitwala K, Markovitz DM. Vimentin is secreted by activated macrophages. *Nat Cell Biol* 2003;5:59-63.
38. Sarria AJ, Panini SR, Evans RM. A functional role for vimentin intermediate filaments in the metabolism of lipoprotein-derived cholesterol in human SW-13 cells. *J Biol Chem* 1992;267:19455-19463.
39. Santos MI, Tuzlakoglu K, Fuchs S, Gomes ME, Peters K, Unger RE, Piskin E, et al. Endothelial cell colonization and angiogenic potential of combined nano- and micro-fibrous scaffolds for bone tissue engineering. *Biomaterials* 2008;29:4306-4313.
40. Shen WJ, Zaidi SK, Patel S, Cortez Y, Ueno M, Azhar R, Azhar S, et al. Ablation of vimentin results in defective steroidogenesis. *Endocrinology* 2012;153:3249-3257.
41. Satelli A, Li S. Vimentin in cancer and its potential as a molecular target for cancer therapy. *Cell Mol Life Sci* 2011;68:3033-3046.
42. Ivaska J. Vimentin: Central hub in EMT induction? *Small GTPases* 2011;2:51-53.
43. Ulirsch J, Fan C, Knafl G, Wu MJ, Coleman B, Perou CM, Swift-Scanlan T. Vimentin DNA methylation predicts survival in breast cancer. *Breast Cancer Res Treat* 2013;137:383-396.
44. Costa VL, Henrique R, Danielsen SA, Duarte-Pereira S, Eknaes M, Skotheim RI, Rodrigues A, et al. Three epigenetic biomarkers, GDF15, TMEFF2, and VIM, accurately predict bladder cancer from DNA-based analyses of urine samples. *Clin Cancer Res* 2010;16:5842-5851.
45. Jung S, Yi L, Kim J, Jeong D, Oh T, Kim CH, Kim CJ, et al. The role of vimentin as a methylation biomarker for early diagnosis of cervical cancer. *Mol Cells* 2011;31:405-411.
46. Kisiel JB, Yab TC, Taylor WR, Chari ST, Petersen GM, Mahoney DW, Ahlquist DA. Stool DNA testing for the detection of pancreatic cancer: assessment of methylation marker candidates. *Cancer* 2012;118:2623-2631.
47. Kitamura Y, Shirahata A, Sakuraba K, Goto T, Mizukami H, Saito M, Ishibashi K, et al. Aberrant methylation of the Vimentin gene in hepatocellular carcinoma. *Anticancer Res* 2011;31:1289-1291.
48. Chen WD, Han ZJ, Skoletsy J, Olson J, Sah J, Myeroff L, Platzer P, et al. Detection in fecal DNA of colon cancer-specific methylation of the nonexpressed vimentin gene. *J Natl Cancer Inst* 2005;97:1124-1132.

49. Itzkowitz SH, Jandorf L, Brand R, Rabeneck L, Schroy PC, III, Sontag S, Johnson D, et al. Improved fecal DNA test for colorectal cancer screening. *Clin Gastroenterol Hepatol* 2007;5:111-117.
50. Lao VV, Grady WM. Epigenetics and colorectal cancer. *Nat Rev Gastroenterol Hepatol* 2011;8:686-700.
51. Baek YH, Chang E, Kim YJ, Kim BK, Sohn JH, Park DI. Stool methylation-specific polymerase chain reaction assay for the detection of colorectal neoplasia in Korean patients. *Dis Colon Rectum* 2009;52:1452-1459.
52. Ngan CY, Yamamoto H, Seshimo I, Tsujino T, Man-i M, Ikeda JI, Konishi K, et al. Quantitative evaluation of vimentin expression in tumour stroma of colorectal cancer. *Br J Cancer* 2007;96:986-992.
53. Boberg KM, Jebsen P, Clausen OP, Foss A, Aabakken L, Schrumpf E. Diagnostic benefit of biliary brush cytology in cholangiocarcinoma in primary sclerosing cholangitis. *J Hepatol* 2006;45:568-574.
54. Weisenberger DJ, Campan M, Long TI, Kim M, Woods C, Fiala E, Ehrlich M, et al. Analysis of repetitive element DNA methylation by MethyLight. *Nucleic Acids Res* 2005;33:6823-6836.
55. Lind GE, Danielsen SA, Ahlquist T, Merok MA, Andresen K, Skotheim RI, Hektoen M, et al. Identification of an epigenetic biomarker panel with high sensitivity and specificity for colorectal cancer and adenomas. *Mol Cancer* 2011;10:85.
56. Lofton-Day C, Model F, deVos T, Tetzner R, Distler J, Schuster M, Song X, et al. DNA methylation biomarkers for blood-based colorectal cancer screening. *Clin Chem* 2008;54:414-423.

A)

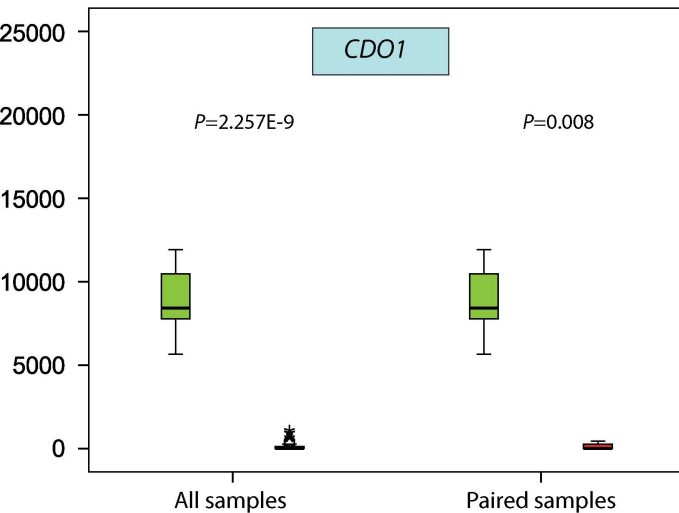

B)

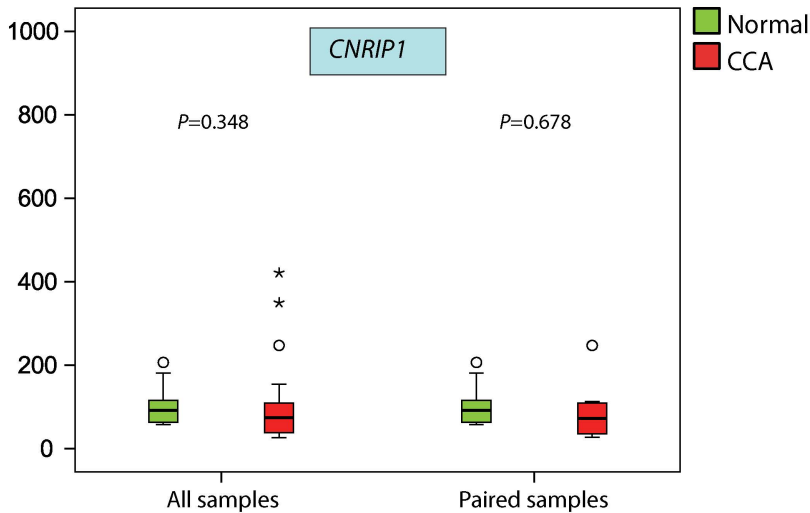

C)

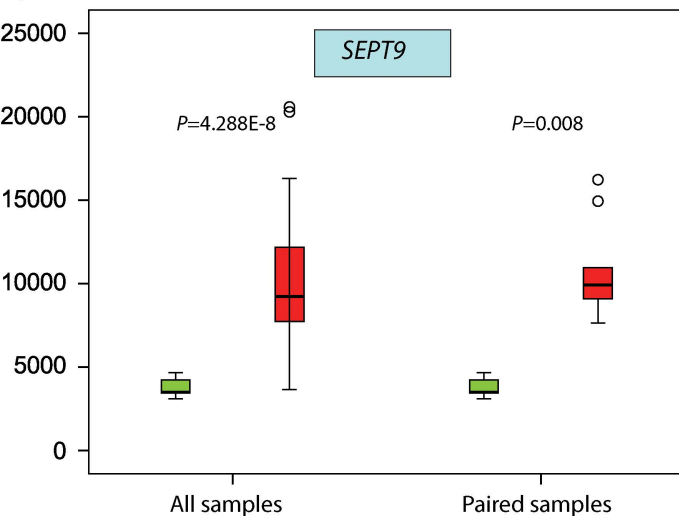

D)

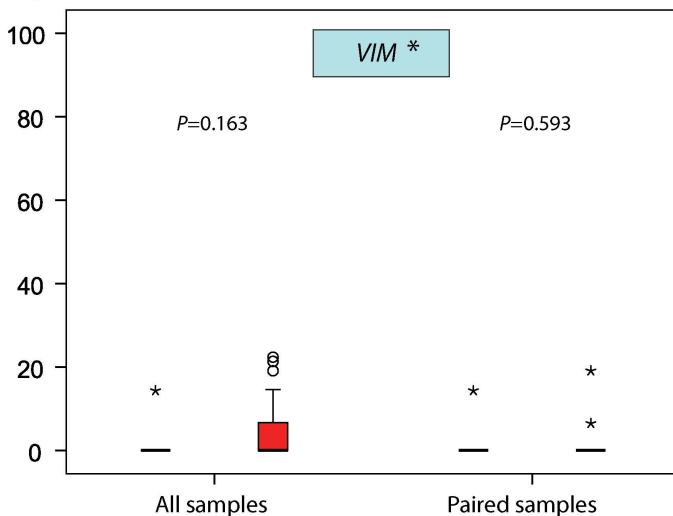

a)

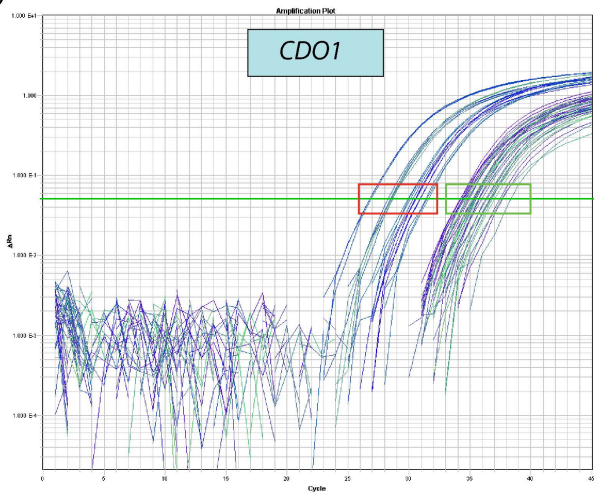

b)

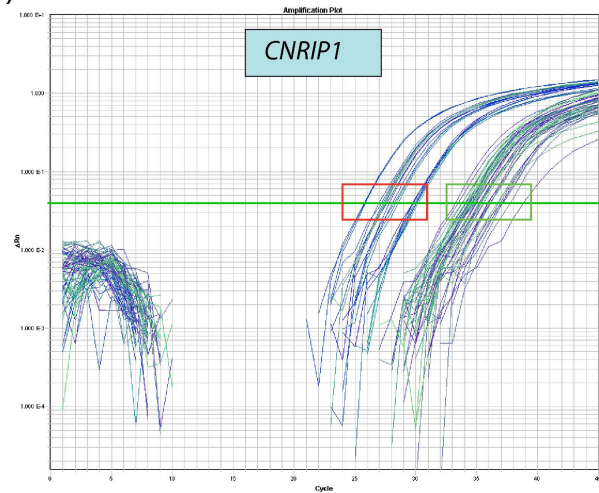

c)

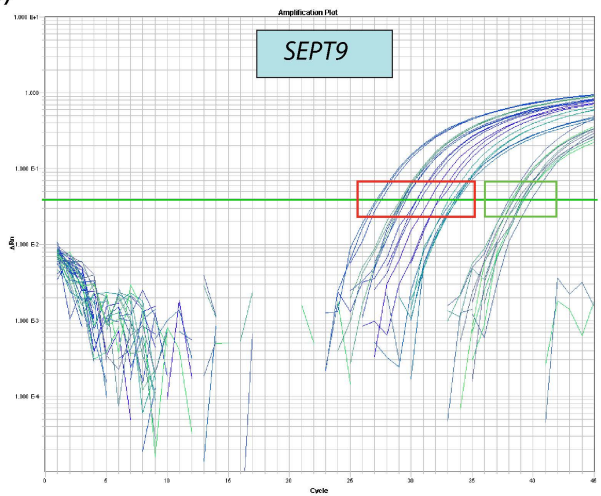

d)

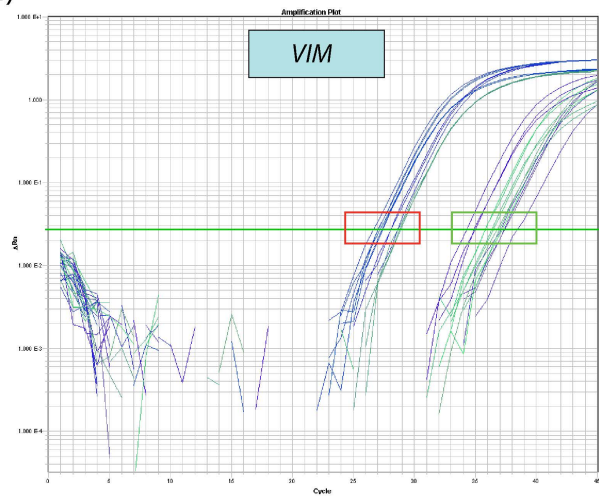

|                      | CDO1  | CNRIP1 | SEPT9 | VIM   | Biomarker panel | Cytology |
|----------------------|-------|--------|-------|-------|-----------------|----------|
| GBC                  |       |        |       |       |                 | ○        |
|                      |       |        |       |       |                 | ●        |
|                      |       |        |       |       |                 | ○        |
|                      |       |        |       |       |                 | ○        |
| Sensitivity          | 75 %  | 75 %   | 25 %  | 25 %  | 75 %            | 20 %     |
| Combined sensitivity |       |        |       |       | 60 %            |          |
| Specificity          | 100 % | 100 %  | 100 % | 100 % | 100 %           | 100 %    |
| PC                   |       |        |       |       |                 | ●        |
|                      |       |        |       |       |                 | ●        |
|                      |       |        |       |       |                 | ○        |
| Sensitivity          | 75 %  | 75 %   | 50 %  | 25 %  | 75 %            | 50 %     |
| Combined sensitivity |       |        |       |       | 100 %           |          |
| Specificity          | 100 % | 100 %  | 100 % | 100 % | 100 %           | 100 %    |

|     | Brush<br>sample<br>number | Tissue samples | Brush samples |
|-----|---------------------------|----------------|---------------|
| CCA | 4b                        |                |               |
|     | 5                         |                |               |
|     | 6                         |                |               |
|     | 7                         |                |               |
|     | 8                         |                |               |
|     | 10a/10b                   |                |               |
|     | 11                        |                |               |
|     | 12                        |                |               |
| PSC | 32                        |                |               |
|     | 84                        |                |               |
|     | 89                        |                |               |
|     | 11                        |                |               |
|     | 18                        |                |               |
